# Supplementary material
Source: publisher figshare collection journal article supplement (https://karger.figshare.com/ndownloader/files/27670656)
Supplement: Supplementary file 1 [file 27670656]

**Supplementary Material:**

**Supplementary Figure 1:**

**Figure S1:** Donors and plasmapheresis procedures: Fig S1a: No of donors (female, male and all donors) donating on consecutive plasmapheresis session (1st session up a maximum of 8 sessions) for consecutive plasmapheresis sessions. Fig S1b: Proportion of donors donating for the indicated consecutive number of plasmapheresis procedures.

**Supplementary Figure S2:**

**Figure S2:** Correlations between anti-SARS-CoV-2 neutralizing antibodies expressed as PRNT50 titer and anti-SARS-CoV-2 IgA antibodies (Fig.S2a) and IgG antibodies (Fig.S2b). The dashed lines show the linear regression and the dotted lines the 95% confidence limits.
